# Supplementary material
Source: PubMed Central journal article supplement (PMC2861161)
Supplement: NIHMS186859-supplement-1.pdf [file NIHMS186859-supplement-1.pdf]

Supplementary Table 1 – Hematologic toxicity parameters

|                                                        | <b>LD</b>   | <b>SD</b>    | <b>p value</b>    |
|--------------------------------------------------------|-------------|--------------|-------------------|
| Minimal neutrophil count <sup>1</sup>                  | 1056 ± 92.2 | 1050 ± 123.8 | 0.97 <sup>a</sup> |
| Minimal Platelet count <sup>1</sup>                    | 127 ± 8.6   | 122 ± 9.3    | 0.75 <sup>a</sup> |
| Minimal hematocrit <sup>1</sup>                        | 35.4 ± 0.61 | 34.4 ± 0.92  | 0.36 <sup>a</sup> |
| Granulocyte colony stimulating factor use <sup>2</sup> | 10%         | 7%           | 1.00 <sup>b</sup> |
| Erythropoietin use <sup>2</sup>                        | 0%          | 11%          | 0.10 <sup>b</sup> |
| Ribavirin dose reduction <sup>2</sup>                  | 0%          | 7%           | 0.10 <sup>b</sup> |
| Peginterferon dose reduction <sup>2</sup>              | 3%          | 4%           | 1.00 <sup>b</sup> |

-----  
<sup>1</sup> Mean ± standard deviation

<sup>2</sup> Percent of patients

<sup>a</sup> Student's t-test

<sup>b</sup> Fisher's exact test

## Figure Legends

Figure 1. (a) The average level of HCV RNA ( $\pm$  standard error of the mean, SEM) during treatment. The solid line denotes SD, LD is marked by the dashed line. The dotted line marks the lower limit of detection. \*\* -  $p < 0.01$ , \* -  $p < 0.05$  (unpaired Student's t-test). (b) Kaplan-Meier analysis of time to negative serum HCV RNA on treatment (per protocol analysis). (c) First phase decline of HCV RNA levels. Patients who achieved SVR are marked with a circle, patients who did not achieve SVR by triangles (per-protocol analysis). (d) Second phase slope according to treatment group and result (per-protocol analysis).

Figure 2 – (a) Correlation of baseline serum IP-10 levels with liver IP-10 mRNA levels (normalized to GAPDH mRNA levels, arbitrary units).  $r^2 = 0.489$ ,  $p = 0.025$ . (b) Serum IP-10 level fold induction relative to day 0 for LD (solid line, squares) and SD (dashed line, triangles). \*  $p < 0.05$ . (c) Day 2 IP-10 induction vs. baseline levels. LD marked with squares, SD with triangles. Open symbols mark treatment failure and filled symbols mark SVR.

Supplementary Figure 1 – Trial design. Patients were enrolled into the low dose (LD) or standard dose (SD) groups, for a planned duration of 24 weeks. At week 12 of treatment, patients who did not become HCV RNA negative were defined as non-responders and received extended therapy (ET) with full dose for another 36 weeks. Patients who relapsed after the end of treatment were given ET for 48 weeks.

Supplementary Figure 2 – Decay of IP-10 levels in stored serum samples. Pre-treatment IP-10 levels (all measured on December 2007) are displayed against the date the sample was drawn. Linear regression slope  $-0.24\text{pg}/(\text{ml}\cdot\text{day})$  (dashed line),  $r^2=0.13$ .

Supplementary Figure 3 - HCV RNA levels during initial therapy (solid line) and ET course (dashed line) for individual patients. ND - non-detectable. (a, b) Relapsers after initial LD treatment. (c) Non-responder to initial LD treatment. Switched to ET on week 16. (d) Relapser after initial SD treatment.
